# Supplementary material for: Attenuation of MODS-related and ARDS-related mortality makes infectious complications a remaining challenge in the severely injured
Source: PubMed Central journal article supplement — Trauma Surg Acute Care Open. 2020 Feb 4;5(1):e000398. doi: 10.1136/tsaco-2019-000398 (PMC7046953; doi:10.1136/tsaco-2019-000398), 2020-02-04
Supplement: tsaco-2019-000398supp001.pdf [file tsaco-2019-000398supp001.pdf]

**Supplemental Table S1.** Definitions of specific infections.

| <b>Type of infection [reference]</b>   | <b>Definition</b>                                                                                                                                                                                                                                                                                                                                                                                                                                                                                                                                                                                     |
|----------------------------------------|-------------------------------------------------------------------------------------------------------------------------------------------------------------------------------------------------------------------------------------------------------------------------------------------------------------------------------------------------------------------------------------------------------------------------------------------------------------------------------------------------------------------------------------------------------------------------------------------------------|
| <b>Pneumonia [9]</b>                   | Change in character of sputum with increased suction requirements, new onset cough, dyspnea or tachypnea, pyrexia $\geq 38^{\circ}\text{C}$ , WBC $<4,0$ or $>12,0 \times 10^9/\text{L}$ , worsening gaseous exchange, new or progressive infiltrates on chest x-ray study.                                                                                                                                                                                                                                                                                                                           |
| <b>Fracture related infection [18]</b> | Culture of distinct pathogens from at least 2 separate deep tissue/implant specimens in the presence of a fistula, sinus, or wound breakdown (with communication to the bone or implant) and/or purulent drainage from the wound or presence of pus during surgery. clinical signs comprising local redness, swelling, increased local temperature, fever ( $\geq 38.3^{\circ}\text{C}$ ), or persistent, increasing, or new-onset wound drainage beyond the first few days.                                                                                                                          |
| <b>Positive blood culture [9]</b>      | Recognized pathogen cultured from 1 or more blood cultures or common skin contaminants cultured from 2 or more blood cultures on 2 separate occasions within a 48-hour period.                                                                                                                                                                                                                                                                                                                                                                                                                        |
| <b>Septic shock [19]</b>               | Suspected or proven infection and two or more of the following criteria are met: tachycardia ( $>90/\text{min}$ ), tachypnea ( $>20/\text{min}$ ), $>38.5^{\circ}\text{C}$ or temperature $< 35.6^{\circ}\text{C}$ , WBC $<4,0$ or $>12,0 \times 10^9/\text{L}$ . associated with persisting organ dysfunction, hypoperfusion, or hypotension despite adequate fluid resuscitation.                                                                                                                                                                                                                   |
| <b>Abdominal abscess [16]</b>          | Organisms cultured from purulent material from intraabdominal space obtained during a surgical operation or needle aspiration, or at least 2 of the following signs or symptoms with no other recognized cause: fever ( $\geq 38^{\circ}\text{C}$ ), nausea, vomiting, abdominal pain, or jaundice and at least 1 of the following:<br>a. organisms cultured from drainage from surgically placed drain<br>b. organisms seen on Gram's stain of drainage or tissue obtained during surgical operation or needle aspiration<br>c. organisms cultured from blood and radiographic evidence of infection |
| <b>Wound infection [9,17]</b>          | Organisms isolated from wound, discharge or tissue of surgical incision(s) or surgical wound dehiscence and/or visual evidence of surgical site infection diagnosed by a surgeon. Localized heat, redness, swelling, tenderness, pyrexia $\geq 38^{\circ}\text{C}$ .                                                                                                                                                                                                                                                                                                                                  |
| <b>Thrombophlebitis [16]</b>           | At least 2 of the following signs or symptoms caused by a superficial venous cannula: pain or tenderness, localized swelling, redness, or heat                                                                                                                                                                                                                                                                                                                                                                                                                                                        |
| <b>Thorax empyema [16]</b>             | Organisms cultured from lung tissue or pleural fluid either during a surgical operation or histopathologic examination or organisms cultured from an abscess cavity seen on radiographic examination of lung.                                                                                                                                                                                                                                                                                                                                                                                         |
| <b>UTI [9]</b>                         | Positive urine culture (collected using appropriate sterile technique) and/or elevated WBC count and inflammatory markers, pyrexia $\geq 38^{\circ}\text{C}$ , dysuria, abdominal/flank pain.                                                                                                                                                                                                                                                                                                                                                                                                         |

---

|                                  |                                                                                                                                                                                                                                                                                                                                                                                                                                                                                                                                                                                                               |
|----------------------------------|---------------------------------------------------------------------------------------------------------------------------------------------------------------------------------------------------------------------------------------------------------------------------------------------------------------------------------------------------------------------------------------------------------------------------------------------------------------------------------------------------------------------------------------------------------------------------------------------------------------|
| <b>Secondary meningitis [16]</b> | organisms cultured from CSF after craniotomy or pressure monitor insertion or at least 1 of the following signs or symptoms with no other recognized cause: fever (>38°C), headache, stiff neck, meningeal signs, cranial nerve signs, or irritability and at least 1 of the following:<br>a. increased white cells, elevated protein, and/ or decreased glucose in CSF<br>b. organisms seen on Gram's stain of CSF<br>c. organisms cultured from blood<br>d. positive antigen test of CSF, blood, or urine<br>e. diagnostic single antibody titer (IgM) or 4-fold increase in paired sera (IgG) for pathogen |
|----------------------------------|---------------------------------------------------------------------------------------------------------------------------------------------------------------------------------------------------------------------------------------------------------------------------------------------------------------------------------------------------------------------------------------------------------------------------------------------------------------------------------------------------------------------------------------------------------------------------------------------------------------|

---

WBC=white blood cell, CSF= cerebrospinal fluid
